# Supplementary material for: Bromination of organic spacer impacts on the structural arrangement, phase transitions, and optical and electrical properties of a hybrid halide compound:[(CH3)3N(CH2)3Br]2PdBr4
Source: Royal Society of Chemistry journal article supplement (doi:10.1039/d3nj04819e), 2023-11-24
Supplement: d3nj04819e1.pdf [file d3nj04819e1.pdf]

## Supporting Information

### **Bromination of organic spacer impacts on the structural arrangement, phase transitions, optical and electrical properties of hybrid halide compound: $[(\text{CH}_3)_3\text{N}(\text{CH}_2)_3\text{Br}]_2\text{PdBr}_4$**

**Mohamed Saadi<sup>a</sup>, Imen dakhlaoui<sup>a</sup>, Fadhel Hajlaoui<sup>b</sup>, Nidhal Drissi<sup>c</sup>, Mustapha Zighrioui<sup>d</sup>, Fethi Jomni<sup>a</sup>, Nathalie Audebrand<sup>e</sup>, Marie Cordier<sup>e</sup>, Karoui Karim<sup>f,d,\*</sup>**

<sup>a</sup>Université de Tunis El Manar, Laboratoire LMOP, LR99ES17, El Manar, 2092 Tunis, Tunisia.

<sup>b</sup>Laboratoire Physico-chimie de l'Etat Solide, Département de Chimie, Faculté des Sciences de Sfax, Université de Sfax, B.P. 1171, 3000 Sfax, Tunisia

<sup>c</sup>Department of Physics, Faculty of Science, King Khalid University, P.O. Box 9004, Abha 61413, Saudi Arabia

<sup>d</sup>GREMAN UMR, 7347-CNRS, CEA, INSACVL, Université de Tours, Blois, France

<sup>e</sup>Univ Rennes, CNRS, INSA Rennes, ISCR (Institut des Sciences Chimiques de Rennes) - UMR 6226, F-35000 Rennes, France

<sup>f</sup>Laboratoire des Caractérisations Spectroscopiques et Optique des Matériaux, Faculté des Sciences de Sfax, Université de Sfax, B.P. 1171, 3000 Sfax, Tunisia.

*\*Corresponding Authors' E-mail: karouikarim36@yahoo.com*

## Table of Content:

**Figure S1.** Plot of the Le Bail fit of powder X-ray diffraction pattern recorded at 293 K for  $[(\text{CH}_3)_3\text{N}(\text{CH}_2)_3\text{Br}]_2\text{PdBr}_4$ : orthorhombic space group *Pbca*, lattice parameters of  $a = 9.1496(1)\text{Å}$ ,  $b = 14.5376(2)\text{Å}$ ,  $c = 17.4081(2)\text{Å}$ ;  $R_p = 3.99$ ,  $R_{wp} = 5.33$ ,  $R_{exp} = 2.89$ .

**Figure S2.** Packing structure of the  $[(\text{CH}_3)_3\text{N}(\text{CH}_2)_3\text{Br}]_2\text{PdBr}_4$  compound along the *b* and *c*-axes.

**Figure S3.** Hydrogen-bonding interactions for  $[(\text{CH}_3)_3\text{N}(\text{CH}_2)_3\text{Br}]_2\text{PdBr}_4$ .

**Figure S4.** Molecular structure of  $[(\text{CH}_3)_3\text{N}(\text{CH}_2)_3\text{Br}]_2\text{PdBr}_4$  highlighting the hydrogen-bonding interactions between the  $[(\text{CH}_3)_3\text{N}(\text{CH}_2)_3\text{Br}]^+$  cations and the bromine atoms.

**Figure S5.** Raman spectra of  $[(\text{CH}_3)_3\text{N}(\text{CH}_2)_3\text{Br}]_2\text{PdBr}_4$  at room temperature before heating, after cooling and at 403K.

**Figure S6.** Evolution of Raman spectra vs temperature for  $[(\text{CH}_3)_3\text{N}(\text{CH}_2)_3\text{Br}]_2\text{PdBr}_4$ .

**Figure S7.** Variation of the position of the vibration modes as function temperature of  $[(\text{CH}_3)_3\text{N}(\text{CH}_2)_3\text{Br}]_2\text{PdBr}_4$ .

**Table S1.** Selected bond distances ( $\text{\AA}$ ) and angles ( $^\circ$ ) for  $[(\text{CH}_3)_3\text{N}(\text{CH}_2)_3\text{Br}]_2\text{PdBr}_4$ .

**Table S2.** Hydrogen-bonding geometry ( $\text{\AA}$ ,  $^\circ$ ) for  $[(\text{CH}_3)_3\text{N}(\text{CH}_2)_3\text{Br}]_2\text{PdBr}_4$ .

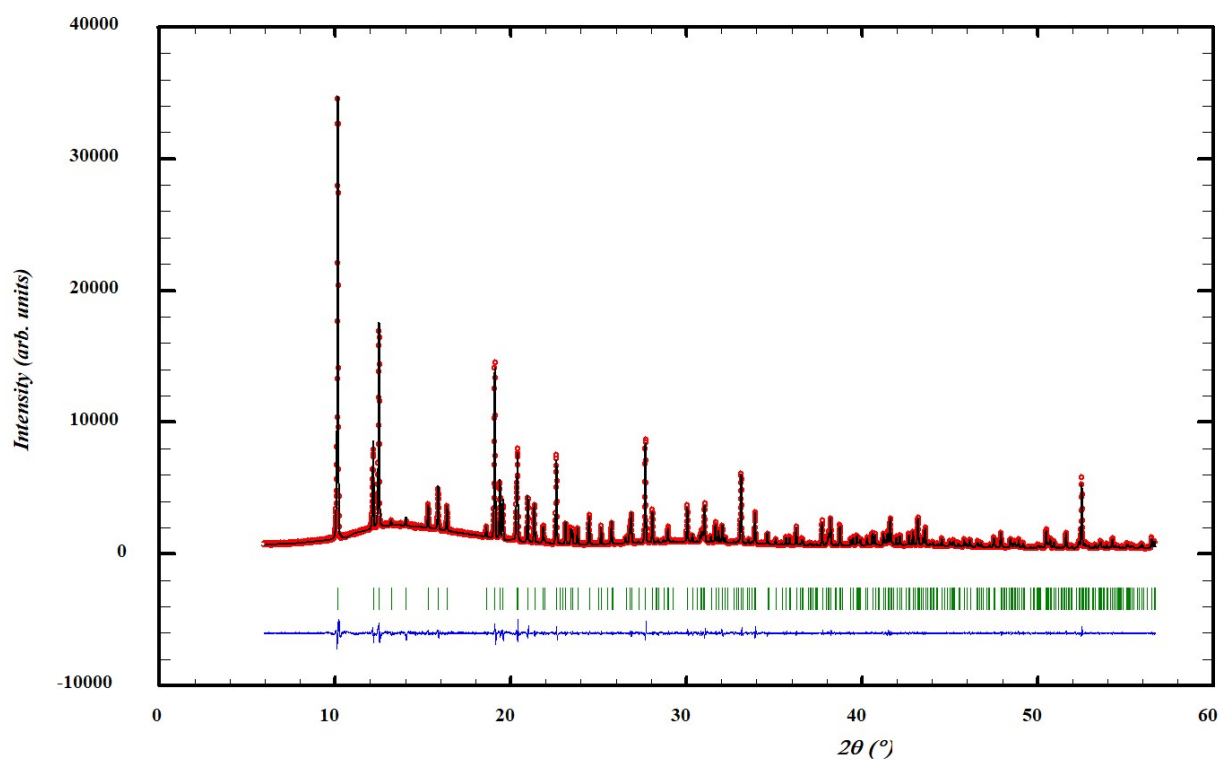

**Figure S1.** Plot of the Le Bail fit of powder X-ray diffraction pattern recorded at 293 K for  $[(\text{CH}_3)_3\text{N}(\text{CH}_2)_3\text{Br}]_2\text{PdBr}_4$ : orthorhombic space group  $Pbca$ , lattice parameters of  $a = 9.1496(1)\text{\AA}$ ,  $b = 14.5376(2)\text{\AA}$ ,  $c = 17.4081(2)\text{\AA}$ ;  $R_p = 3.99$ ,  $R_{wp} = 5.33$ ,  $R_{exp} = 2.89$ .

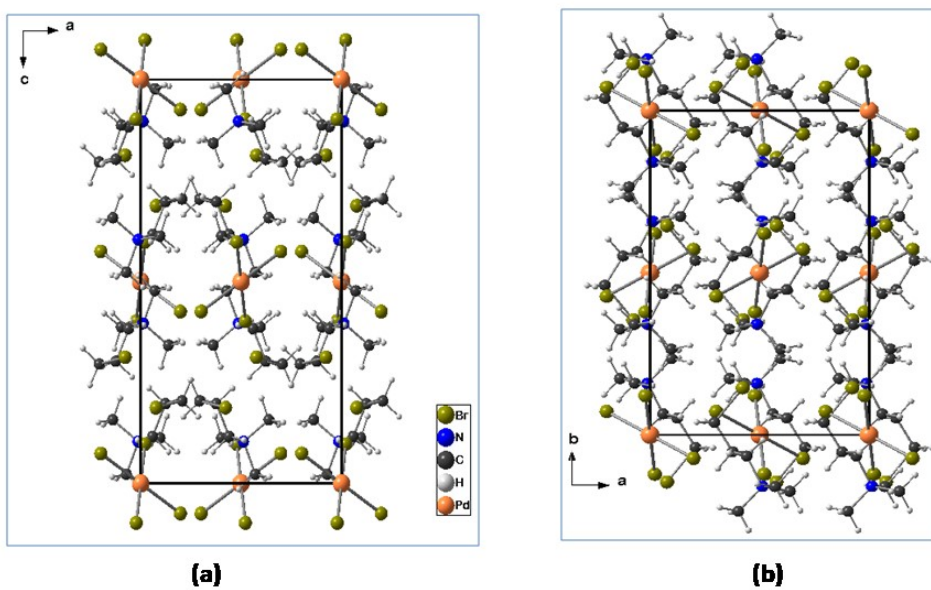

**Figure S2.** Packing structure of the  $[(\text{CH}_3)_3\text{N}(\text{CH}_2)_3\text{Br}]_2\text{PdBr}_4$  compound along the  $b$  and  $c$ -axes.

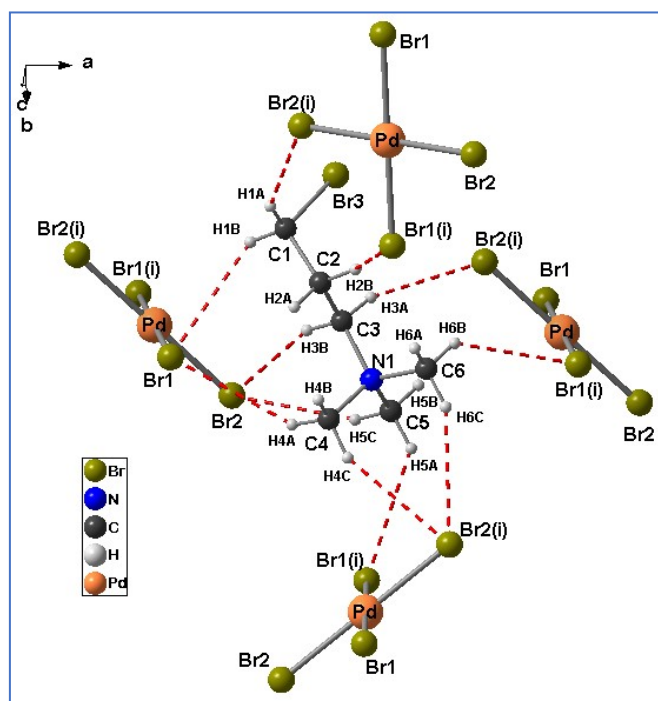

**Figure S3.** Hydrogen-bonding interactions for  $[(\text{CH}_3)_3\text{N}(\text{CH}_2)_3\text{Br}]_2\text{PdBr}_4$ .

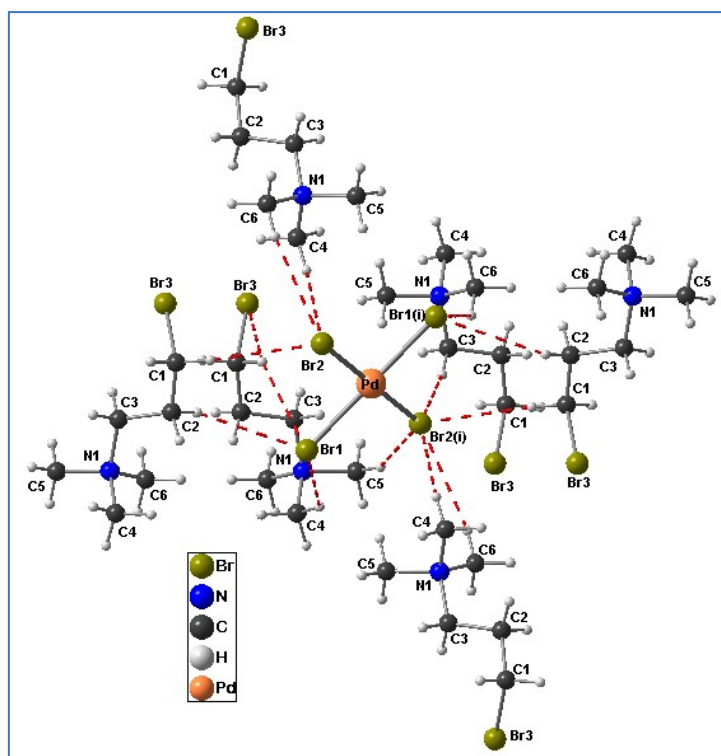

**Figure S4.** Molecular structure of  $[(\text{CH}_3)_3\text{N}(\text{CH}_2)_3\text{Br}]_2\text{PdBr}_4$  highlighting the hydrogen-bonding interactions between the  $[(\text{CH}_3)_3\text{N}(\text{CH}_2)_3\text{Br}]^+$  cations and the bromine atoms.

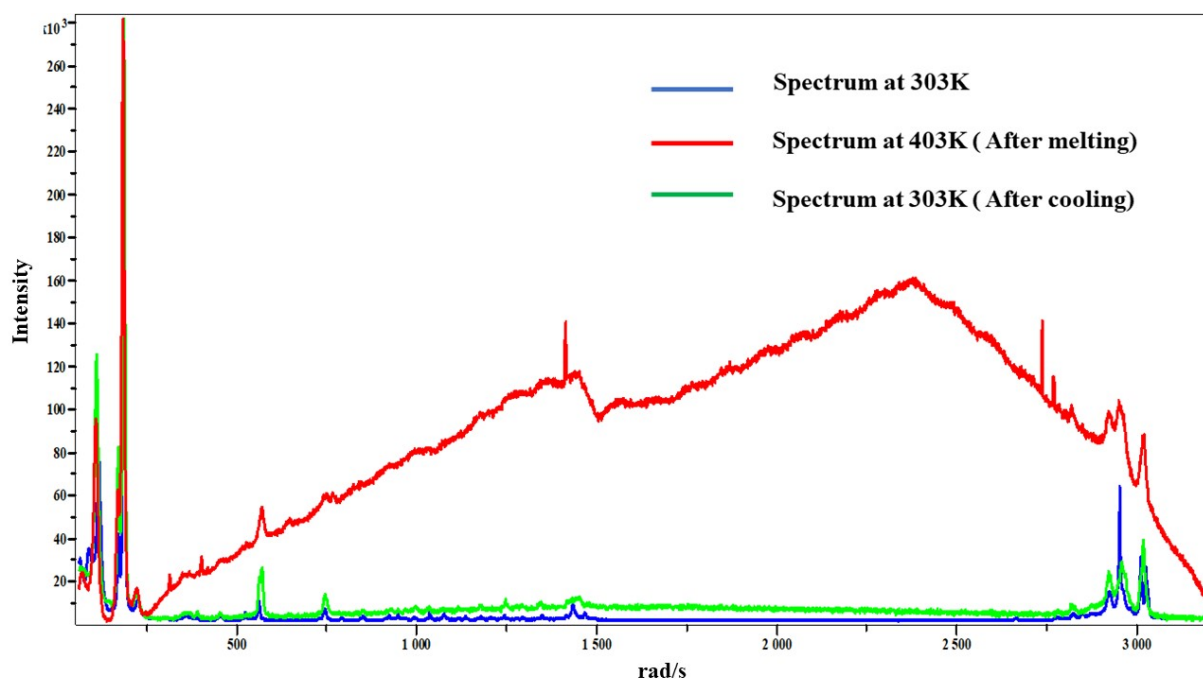

**Figure S5.** Raman spectra of  $[(\text{CH}_3)_3\text{N}(\text{CH}_2)_3\text{Br}]_2\text{PdBr}_4$  at room temperature before heating, after cooling and at 403K.

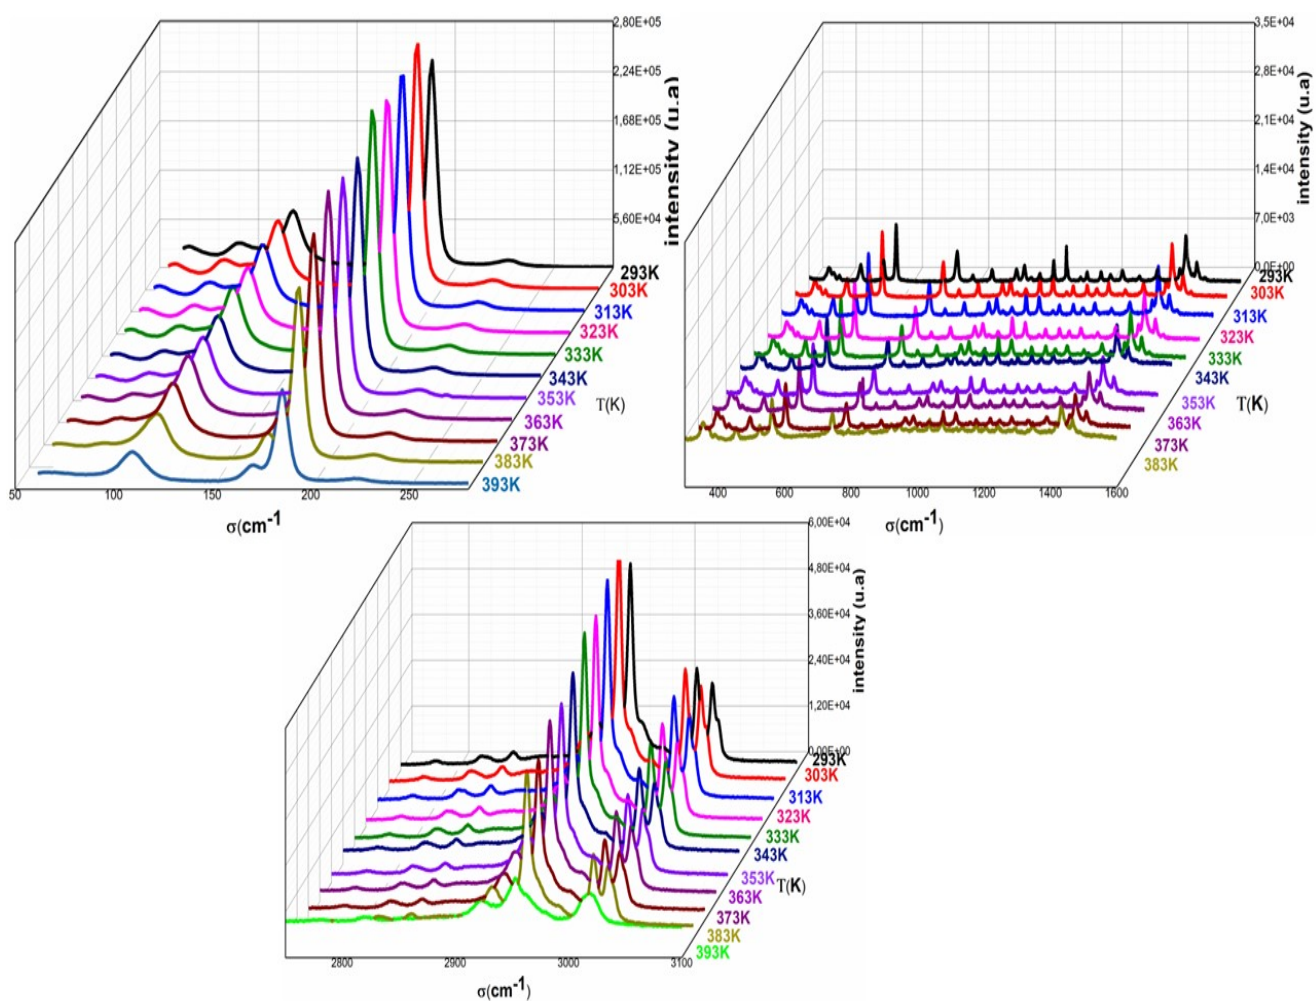

**Figure S6.** Evolution of Raman spectra vs temperature for  $[(\text{CH}_3)_3\text{N}(\text{CH}_2)_3\text{Br}]_2\text{PdBr}_4$ .

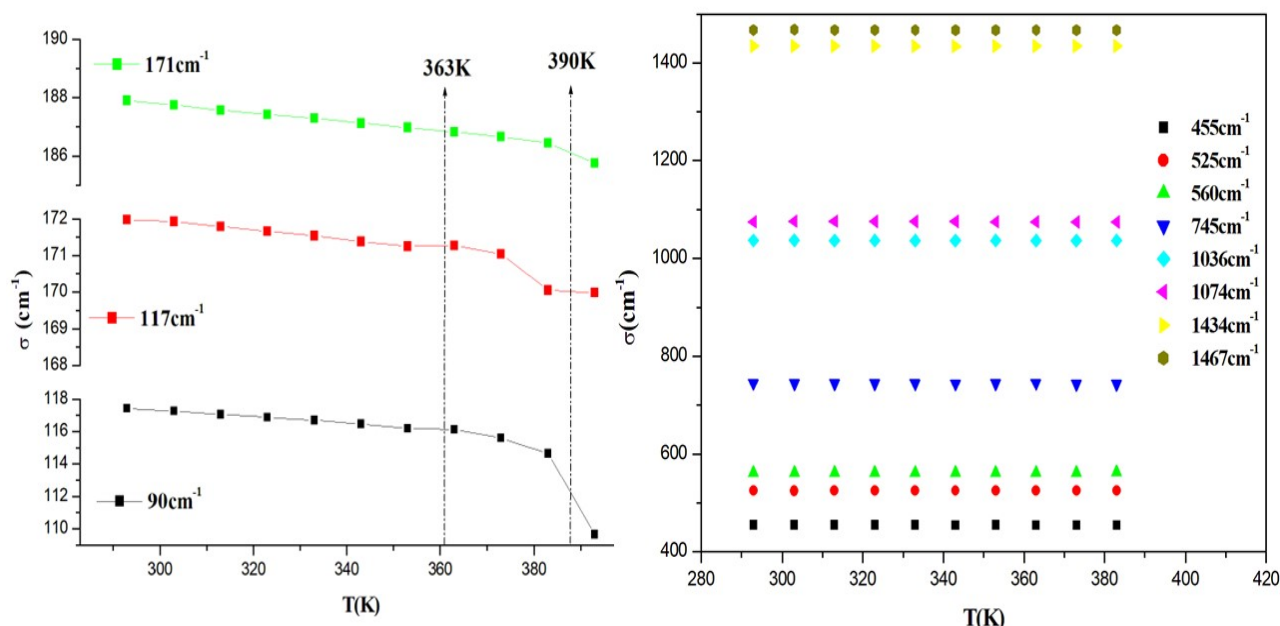

**Figure S7.** Variation of the position of the vibration modes as function temperature of  $[(\text{CH}_3)_3\text{N}(\text{CH}_2)_3\text{Br}]_2\text{PdBr}_4$ .

**Table S1.** Selected bond distances (Å) and angles (°) for  $[(\text{CH}_3)_3\text{N}(\text{CH}_2)_3\text{Br}]_2\text{PdBr}_4$ .

|                                            |             |              |           |
|--------------------------------------------|-------------|--------------|-----------|
| Pd1—Br1                                    | 2.4358 (4)  | C6—N1—C5     | 108.1 (3) |
| Pd1—Br1 <sup>(i)</sup>                     | 2.4358 (4)  | C6—N1—C4     | 109.5 (3) |
| Pd1—Br2                                    | 2.4415 (4)  | C5—N1—C4     | 109.0 (3) |
| Pd1—Br2 <sup>(i)</sup>                     | 2.4415 (4)  | C6—N1—C3     | 111.4 (3) |
| Br1 <sup>(i)</sup> —Pd1—Br1                | 180.0       | C5—N1—C3     | 107.4 (3) |
| Br1 <sup>(i)</sup> —Pd1—Br2 <sup>(i)</sup> | 89.806 (15) | C4—N1—C3     | 111.2 (3) |
| Br1—Pd1—Br2 <sup>(i)</sup>                 | 90.194 (15) | C2—C1—Br3    | 111.7 (3) |
| Br1 <sup>(i)</sup> —Pd1—Br2                | 90.195 (15) | C1—C2—C3     | 111.7 (3) |
| Br1—Pd1—Br2                                | 89.805 (15) | C2—C3—N1     | 114.3 (3) |
| Br2 <sup>(i)</sup> —Pd1—Br2                | 180.0       | Br3—C1—C2—C3 | 62.4 (4)  |
| Br3—C1                                     | 1.963 (4)   | C1—C2—C3—N1  | 174.1 (3) |
| N1—C6                                      | 1.489 (5)   | C6—N1—C3—C2  | 60.9 (4)  |
| N1—C5                                      | 1.491 (5)   | C5—N1—C3—C2  | 179.1 (3) |
| N1—C4                                      | 1.494 (5)   | C4—N1—C3—C2  | 61.6 (4)  |
| N1—C3                                      | 1.520 (4)   |              |           |
| C1—C2                                      | 1.508 (5)   |              |           |
| C2—C3                                      | 1.517 (5)   |              |           |

**Symmetry codes:** (i)  $-x+2, -y, -z$ .

**Table S2.** Hydrogen-bonding geometry (Å, °) for [(CH<sub>3</sub>)<sub>3</sub>N(CH<sub>2</sub>)<sub>3</sub>Br]<sub>2</sub>PdBr<sub>4</sub>.

| <i>D</i> —H··· <i>A</i>                | <i>D</i> —H | H··· <i>A</i> | <i>D</i> ··· <i>A</i> | <i>D</i> —H··· <i>A</i> |
|----------------------------------------|-------------|---------------|-----------------------|-------------------------|
| C1—H1 <i>A</i> ···Br2 <sup>(ii)</sup>  | 0.99        | 2.99          | 3.849 (4)             | 146                     |
| C1—H1 <i>B</i> ···Br1                  | 0.99        | 3.12          | 3.841 (4)             | 131                     |
| C2—H2 <i>B</i> ···Br1 <sup>(iii)</sup> | 0.99        | 3.08          | 3.897 (4)             | 140                     |
| C3—H3 <i>A</i> ···Br2 <sup>(iv)</sup>  | 0.99        | 2.95          | 3.899 (4)             | 160                     |
| C3—H3 <i>B</i> ···Br2                  | 0.99        | 3.02          | 3.962 (4)             | 159                     |
| C4—H4 <i>A</i> ···Br1                  | 0.98        | 3.10          | 3.844 (4)             | 134                     |
| C4—H4 <i>C</i> ···Br2 <sup>(v)</sup>   | 0.98        | 3.00          | 3.914 (4)             | 157                     |
| C5—H5 <i>A</i> ···Br1 <sup>(v)</sup>   | 0.98        | 3.13          | 3.819 (4)             | 129                     |
| C5—H5 <i>C</i> ···Br2                  | 0.98        | 3.06          | 3.976 (4)             | 156                     |
| C6—H6 <i>B</i> ···Br1 <sup>(vi)</sup>  | 0.98        | 2.97          | 3.705 (4)             | 133                     |
| C6—H6 <i>C</i> ···Br2 <sup>(v)</sup>   | 0.98        | 3.07          | 3.979 (4)             | 154                     |

**Symmetry codes:**(ii)  $-x+3/2, -y, z+1/2$ ; (iii)  $x-1/2, y, -z+1/2$ ; (iv)  $-x+1, -y, -z$ ; (v)  $x-1/2, -y+1/2, -z$ ; (vi)  $x-1, y, z$
